# Supplementary material
Source: Elsevier journal article supplement (https://www.sciencedirect.com/science/article/pii/S1413867019304209)
Supplement: mmc1 [file S1413867019304209:mmc1.docx]

**Supplementary Table 1. Source and geographical origin of *Coccidioides* spp. isolates.**

__________________________________________________________________

**Isolate Source Geographical origin**

___________________________________________________________________

| M0104 | Catheter (Peritoneal) | Mexico City, MX |
| --- | --- | --- |
| M1204 | Sputum | Durango, MX |
| M1404 | Cerebrospinal fluid | Torreón, MX |
| M1505 | Cerebrospinal fluid | Torreón, MX |
| M2305 | Pleural secretion | Torreón, MX |
| M2805 | Bronchoalveolar lavage | Torreón, MX |
| M3005 | Sputum | Torreón, MX |
| M3905 | ND | Baja California, MX |
| M5406 | ND | Tijuana, MX |
| M5708 | ND | San Luis Potosí, MX |
| HU1 | ND | Monterrey, MX |
| HU2 | ND | Monterrey, MX |
| HU11 | Bronchoalveolar lavage | Monterrey, MX |
| HU12 | Bronchoalveolar lavage | Monterrey, MX |
| HU18 | Articular secretion | Monterrey, MX |
| HU19 | Bronchial secretion | Monterrey, MX |
| HU24 | Sputum | Monterrey, MX |
| 37.3 | ND | MX |
| 5256 | ND | MX |
| MA | Bronchoalveolar lavage | Campeche, MX |
| SiFe | ND | MX |
| GGM | Sputum | Baja California, MX |
| ZVJ | Pulmonary nodule | Michoacán, MX |
| QR | Knee puncture | MX |
| ANJ | Bronchoalveolar lavage | MX |
| M4005* | Bronchoalveolar lavage | Baja California, MX |
| HJ* | Bronchoalveolar lavage | Baja California, MX |
| 43.3* | Sputum | Guerrero, MX |
| 62* | Sputum | MX |
| 972579 | Node biopsy | Catamarca, AR |
| 73089 | Bronchoalveolar lavage | Catamarca, AR |
| 73094 | Cerebrospinal fluid | Mendoza, AR |
| 73129 | Skin biopsy | Salta, AR |
| 73130 | Blood culture | Catamarca, AR |
| 73131 | Lung biopsy | La Rioja, AR |
| 83376 | Bronchoalveolar lavage | Catamarca, AR |
| 83377 | Skin biopsy | Catamarca, AR |
| 83380 | Leg abscess | Catamarca, AR |
| 83382 | Node biopsy | Santiago del Estero, AR |
| 83381 | Sputum | Catamarca, AR |

______________________________________________________________________________________________

*-isolates identified as *C. immitis*; ND-undetermined; MX-Mexico; AR-Argentina
